# Supplementary material
Source: publisher figshare collection journal article supplement (https://acs.figshare.com/ndownloader/files/6320007)
Supplement: Supplementary file 1 [file 6320007]

## **SUPPORTING INFORMATION**

**Title: Development of a green alternative procedure for simultaneous separation  
and quantification of clove oil and its major bioactive constituents**

Authors: Ming-Chi Wei, Pei-Hui Lin, Show-Jen Hong, Jin-Ming Chen,  
and Yu-Chiao Yang\*

3 pages (cover sheet, Figure S1 and Table S1)

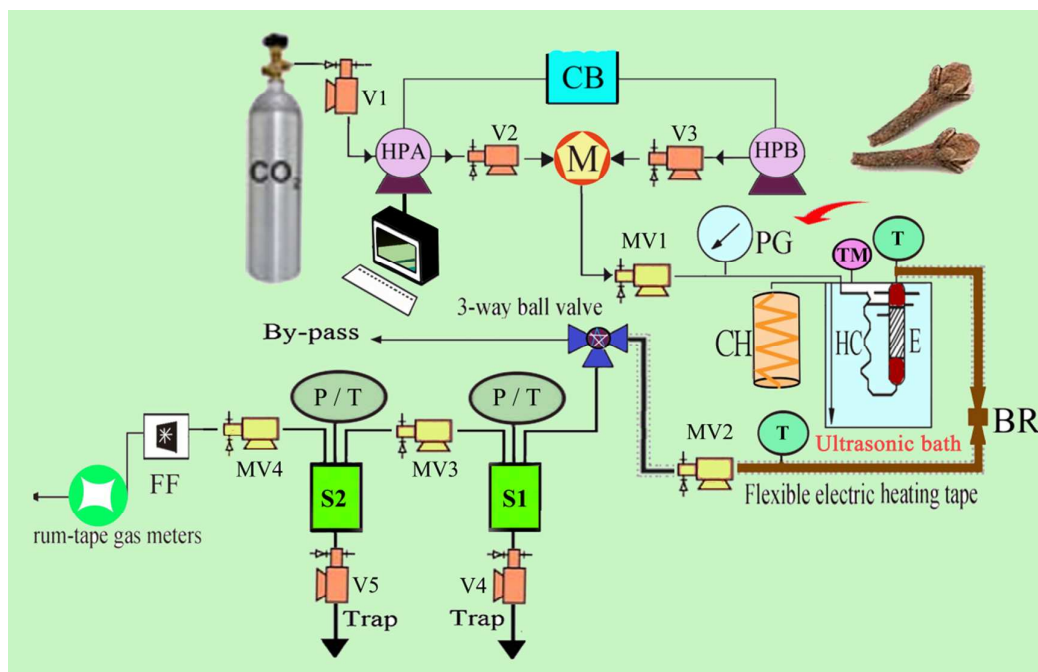

**Figure S1.** The schematic flow diagram of USC-CO<sub>2</sub> extraction apparatus.

V1–5: stopping valve (on-off valve); HPA, HPB: syringe pump; M: mixer; CB: circulation bath; CH: circulating heater; MV1–4: micro-metering valve; HC: heating coil; E: extraction vessel; PG: pressure gauge; BR: backpressure regulator; FF: float flowmeter; T: thermocouple; TM: mercury-in-glass thermometer.

**Table S1.** Spline parameters for assays performed at the pressure of 28.5 MPa and temperature of 32°C using a dried clove with a mean particle size of 0.355 mm, used to choose the adequate CO<sub>2</sub> flow rate.

| CO <sub>2</sub> flow rate<br>(g/min) | $t_{\text{CER}}$<br>(min) | yield <sub>CER</sub><br>(g clove oli/g clove (w/w %)) | $Y_{\text{CER}} \times 10^2$<br>(g clove oil/g CO <sub>2</sub> ) |
|--------------------------------------|---------------------------|-------------------------------------------------------|------------------------------------------------------------------|
| 0.08                                 | 111                       | 9.03                                                  | 20.68                                                            |
| 0.11                                 | 89                        | 10.45                                                 | 21.34                                                            |
| 0.19                                 | 75                        | 14.79                                                 | 21.35                                                            |
| 0.24                                 | 63                        | 15.58                                                 | 21.54                                                            |
| 0.29                                 | 52                        | 15.49                                                 | 21.84                                                            |
| 0.35                                 | 46                        | 16.05                                                 | 21.88                                                            |
| 0.52                                 | 41                        | 17.54                                                 | 17.09                                                            |
| 0.74                                 | 35                        | 18.17                                                 | 13.59                                                            |
